# Supplementary material for: Modulating the ERK1/2–MMP1 Axis through Corosolic Acid Inhibits Metastasis of Human Oral Squamous Cell Carcinoma Cells
Source: MDPI journal article supplement (doi:10.3390/ijms22168641), 2021-08-11
Supplement: s1 [file s1]

# Modulating the ERK1/2–MMP1 Axis through Corosolic Acid Inhibits Metastasis of Human Oral Squamous Cell Carcinoma Cells

Jen-Liang Chen, Chung-Yu Lai, Tsung-Ho Ying, Chiao-Wen Lin, Pei-Han Wang, Fang-Jung Yu, Chung-Jung Liu, Yi-Hsien Hsieh

Supplementary Figure S1

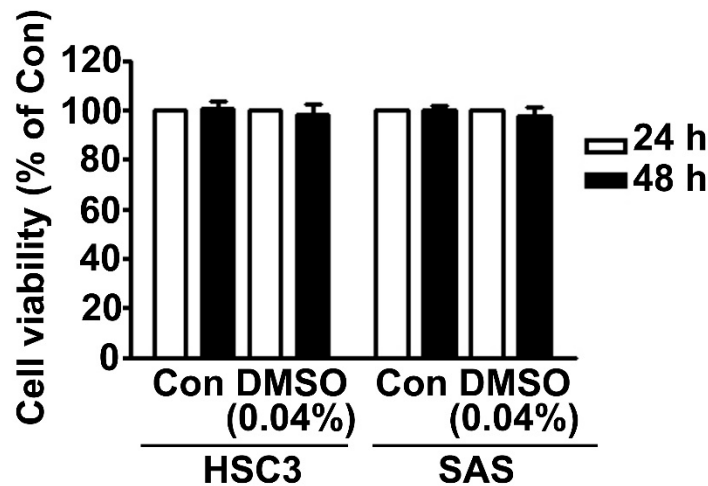

**Supplementary Figure S1:** DMSO (0.04%) in culture medium did not affect the cell viability of HSC3 and SAS cells. HSC3 and SAS cells were treated without DMSO (Con) or with DMSO (0.04%) for 24 and 48 h, cell viability was measured using the MTT assay.

## Supplementary Figure S2

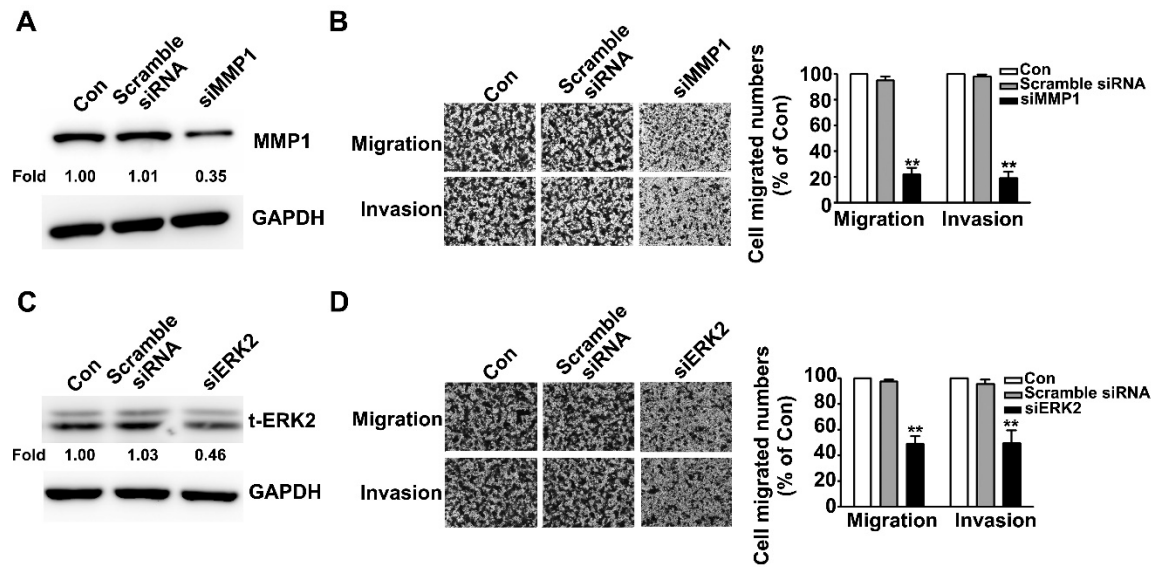

**Supplementary Figure S2.** (A, C) Transfection with scramble siRNA (100 nM), siMMP1(100 nM) or siERK2 (50 nM) into human HSC3 cells for 48 h. The MMP1/ERK2 protein expression by western blotting. (B, D) The cell migrated and invasive abilities of HSC3 cells were measured by in vitro migration and invasion assay. GAPDH as a protein-loading control. \*\*,  $p < 0.01$  versus con (untreated cells)
